# Supplementary material for: Exposures associated with infection with Cryptosporidium in industrialised countries: a systematic review protocol
Source: Springer Nature journal article supplement (doi:10.1186/s13643-018-0731-8), 2018-05-02
Supplement: MOESM2 [file 15733516]

| Question components and search terms                                                                                                                                                                       | Term type                       |      | Boolean operator |
|------------------------------------------------------------------------------------------------------------------------------------------------------------------------------------------------------------|---------------------------------|------|------------------|
|                                                                                                                                                                                                            | Free                            | Mesh |                  |
| <b>Population: cases of cryptosporidiosis</b><br>1 cryptospor*<br>2 humans<br>3 1&2                                                                                                                        | X                               | X    | AND              |
| <b>Exposure: risk factor(s)</b><br>4 epidemiolog*<br>5 risk factors<br>6 exposure<br>7 transmission<br>8 association<br>9 or/4-8                                                                           | X<br>X<br>X<br>X<br>X           |      | OR               |
| <b>Outcome: study endpoints</b><br>10 cohort<br>11 case-control<br>12 "case control"<br>13 case-crossover<br>14 "disease outbreaks"<br>15 meta-analysis<br>16 longitudinal<br>17 ecological<br>18 or/10-17 | X<br>X<br>X<br>X<br>X<br>X<br>X | X    | OR               |
